# Rapid Determination of Myosin Heavy Chain Expression in Rat, Mouse, and Human Skeletal Muscle Using Multicolor Immunofluorescence Analysis

Darin Bloemberg, Joe Quadrilatero\*

Department of Kinesiology, University of Waterloo, Waterloo, Ontario, Canada

## Abstract

Skeletal muscle is a heterogeneous tissue comprised of fibers with different morphological, functional, and metabolic properties. Different muscles contain varying proportions of fiber types; therefore, accurate identification is important. A number of histochemical methods are used to determine muscle fiber type; however, these techniques have several disadvantages. Immunofluorescence analysis is a sensitive method that allows for simultaneous evaluation of multiple MHC isoforms on a large number of fibers on a single cross-section, and offers a more precise means of identifying fiber types. In this investigation we characterized pure and hybrid fiber type distribution in 10 rat and 10 mouse skeletal muscles, as well as human vastus lateralis (VL) using multicolor immunofluorescence analysis. In addition, we determined fiber type-specific cross-sectional area (CSA), succinate dehydrogenase (SDH) activity, and  $\alpha$ -glycerophosphate dehydrogenase (GPD) activity. Using this procedure we were able to easily identify pure and hybrid fiber populations in rat, mouse, and human muscle. Hybrid fibers were identified in all species and made up a significant portion of the total population in some rat and mouse muscles. For example, rat mixed gastrocnemius (MG) contained 12.2% hybrid fibers whereas mouse white tibialis anterior (WTA) contained 12.1% hybrid fibers. Collectively, we outline a simple and time-efficient method for determining MHC expression in skeletal muscle of multiple species. In addition, we provide a useful resource of the pure and hybrid fiber type distribution, fiber CSA, and relative fiber type-specific SDH and GPD activity in a number of rat and mouse muscles.

**Citation:** Bloemberg D, Quadrilatero J (2012) Rapid Determination of Myosin Heavy Chain Expression in Rat, Mouse, and Human Skeletal Muscle Using Multicolor Immunofluorescence Analysis. PLoS ONE 7(4): e35273. doi:10.1371/journal.pone.0035273

**Editor:** Rebecca Berdeaux, University of Texas Health Science Center at Houston, United States of America

**Received:** October 11, 2011; **Accepted:** March 14, 2012; **Published:** April 18, 2012

**Copyright:** © 2012 Bloemberg, Quadrilatero. This is an open-access article distributed under the terms of the Creative Commons Attribution License, which permits unrestricted use, distribution, and reproduction in any medium, provided the original author and source are credited.

**Funding:** This research was supported by the Natural Sciences and Engineering Research Council of Canada (NSERC). The funders had no role in study design, data collection and analysis, decision to publish, or preparation of the manuscript.

**Competing Interests:** The authors have declared that no competing interests exist.

\* E-mail: jquadril@uwaterloo.ca

## Introduction

Skeletal muscle is a heterogeneous tissue containing fibers with diverse morphological and functional characteristics [1,2]. Muscle fibers can be classified into groups based on properties such as contractile speed, myosin heavy chain (MHC) expression, and metabolic capacity [2,3]. In general, adult mammalian muscle can contain 4 major MHC isoforms; one slow isoform (MHCI) and three fast isoforms (MHCIIa, MHCIIx, MHCIIb). Notably, human skeletal muscle does not contain MHCIIb [2,4,5]. As such, fibers expressing MHCI are termed type I fibers, whereas fibers expressing MHCIIa, MHCIIx, and MHCIIb are termed type IIA, type IIX, and type IIB fibers, respectively. In addition, “hybrid” fibers containing two MHC isoforms (i.e., type I/IIA, IIX, IIXB) can also be present in muscle [4,6]. See review by Schiaffino [7] for a recent perspective regarding skeletal muscle fiber types.

Several approaches have been used to identify muscle fiber types, including: 1) determining myosin ATPase activity based on differential responses to various pH levels [8–10], 2) evaluating both myosin ATPase and oxidative enzyme activities [11–13], and 3) using immunohistochemical procedures with antibodies against specific MHC isoforms [14,15]. While useful, evaluating myosin ATPase activity alone or with additional metabolic enzyme histochemistry procedures has a number of disadvantages and

limitations. In particular, this requires multiple muscle cross-sections and incubations, and differences in the pattern of myosin ATPase inactivation following pH pre-incubations for the same fiber type have been noted across species [16]. Standard immunohistochemistry procedures using immunoperoxidase staining are also limited by the need for serial cross-sections to evaluate multiple MHC isoforms. Ultimately, these procedures require a significant time-investment, and do not easily allow for the identification of hybrid fibers. The purpose of this investigation was to: 1) outline a simple and time-efficient immunofluorescence staining protocol for determining MHC expression in rat, mouse, and human skeletal muscle, 2) evaluate the utility of a commercially available MHCIIx antibody in several species, 3) determine the pure (type I, IIA, IIX, IIB) and hybrid (type I/IIA, IIX, IIXB) fiber composition in 1 human, 10 rat, and 10 mouse muscles, and 4) characterize fiber type-specific oxidative potential, glycolytic potential, and cross-sectional area (CSA) in rat, mouse, and human muscle.

## Materials and Methods

### Animals

Male Sprague-Dawley rats (n = 6; age: 21.7 ± 0.5 weeks; weight: 458.2 ± 4.8 g) purchased from Harlan (Indianapolis), and male

C57BL/6 mice (n = 6; age:  $23.0 \pm 0.9$  weeks; weight:  $28.5 \pm 1.2$  g) from an in-house breeding colony were group housed on a 12:12 hr reverse light/dark cycle in a temperature and humidity controlled environment. Standard lab chow and tap water were provided ad libitum. All animal procedures were approved by the University of Waterloo Animal Care Committee (AUPP 09-21).

## Muscle Preparation

Muscles were removed according to the scheme outlined by Armstrong and Phelps [11]. Muscles were chosen because of their common use in muscle biology and exercise physiology research. Whole soleus (Sol), plantaris (Pla), and extensor digitorum longus (EDL) were removed and a portion of the entire circumference around the mid-belly was used. The tibialis anterior was separated into red (RTA) and white (WTA) portions, the gastrocnemius was separated into red (RG), white (WG), and mixed (MG) portions, whereas the vastus intermedius (VI) and the white vastus lateralis (WVL) were isolated from the quadriceps. This resulted in a total of ten rat and mouse muscles/muscle portions. Muscles were embedded in O.C.T. compound (Tissue-Tek), frozen in liquid nitrogen-cooled isopentane, stored at  $-80^{\circ}\text{C}$ , and cut into 10  $\mu\text{m}$  thick cryosections with a cryostat (Thermo Electronic) maintained at  $-20^{\circ}\text{C}$ . Human vastus lateralis (VL) muscle samples from recreationally active males (n = 7; age:  $20.6 \pm 0.6$  years; height:  $183.4 \pm 0.6$  cm; weight:  $72.6 \pm 3.3$  kg) from a recent report [17] were also utilized. Human procedures were approved by the University of Guelph Research Ethics Board (REB# 06MR027).

## Immunofluorescence and Histochemical Analysis

Immunofluorescence analysis of MHC expression was performed with primary antibodies against MHCI (BA-F8), MHCIIa (SC-71, 2F7), MHCIIx (6H1), MHCIIb (BF-F3), and all MHC isoforms except MHCIIx (BF-35) [14,15]. Primary antibodies were purchased from the Developmental Studies Hybridoma Bank (University of Iowa), whereas secondary antibodies were purchased from Invitrogen. See Table 1 and Table 2 for antibody cocktail configurations and immunofluorescence staining procedures, respectively. Slides were visualized with an Axio Observer Z1 microscope (Carl Zeiss) using conventional widefield fluorescence microscopy as well as optical sectioning via structured-illumination fluorescence microscopy (Apotome, Carl Zeiss). The microscope was equipped with Red (Excitation: BP 545/25 nm; Emission BP 605/70 nm), Green (Excitation: BP 470/40 nm; Emission BP 525/50 nm), Blue (Excitation: BP 365/12 nm; Emission LP 397 nm) filters, an AxioCam HRm camera, and AxioVision software (Carl Zeiss). Individual images were taken across the entire cross-section and assembled into a composite panoramic image with Microsoft Image Composite Editor (Microsoft). For fiber type analysis, all fibers within the entire muscle/cross-section were characterized. Fiber CSA measurements for each fiber type were performed by outlining at least 40% of all fibers within a muscle/cross-section. Fiber counts, fiber type percentages, and CSA data are reported as group means  $\pm$  SEM based on individual animal/subject means/values (rats: n = 6; mice: n = 6; humans: n = 7). Quantification was performed to assess relative fluorescence in previously categorized pure and hybrid fibers in a subset of muscles from each species. Pure and hybrid fiber fluorescence was determined ( $>20$  fibers per type/sample) by subtracting the average fluorescence from unstained fibers (background) within a particular color channel. Fluorescence in pure fibers is expressed in arbitrary units (AU) and assigned a value of 1.0, with corresponding hybrid fibers expressed relative to the fluorescence obtained in the respective pure fibers.

Histochemical staining for succinate dehydrogenase (SDH) [18,19] and  $\alpha$ -glycerophosphate dehydrogenase (GPD) [20] activity were determined as general indices of oxidative and glycolytic potential, respectively. For each enzyme, histochemical staining of all muscles or muscle portions for a given animal was performed simultaneously. Images were acquired with a bright-field Nikon microscope linked to a PixeLink digital camera and quantified with Image-Pro PLUS analysis software (Image-Pro PLUS). Individual images were assembled into composite panoramic images and matched to images obtained in the MHC analysis. SDH and GPD activity staining were determined on the same fibers analysed for CSA, and calculated by subtracting the background from 3–4 areas on each slide. Data are expressed relative to the values obtained in type I fibers (soleus for rat and mouse, VL for human), assigned a reference value of 1.0, and reported as mean optical density in AU. Fiber counts, SDH, and GPD data are reported as group means  $\pm$  SEM based on individual animal/subject means/values (rats: n = 6; mice: n = 6; humans: n = 7).

## Results

### Rat and Mouse Muscle MHC Expression

Incubation of rat and mouse muscle cross-sections with an antibody cocktail resulted in positive staining of the same fibers as serial cross-sections incubated with individual antibodies (*Supplementary Figure S1*). In addition, strong fluorescent staining was observed in muscles incubated with primary and secondary antibody cocktails, whereas negligible staining was observed in control slides incubated with the secondary antibody cocktail only (*Supplementary Figure S2*). Therefore, all subsequent experiments were performed with antibody cocktails. Immunofluorescence analysis on a single muscle cross-section was able to easily identify the four major adult fiber types, notably type I (blue), type IIA (green), type IIB (red), and type IIX (unstained). In addition, we confirmed the identity of these unstained fibers as type IIX by staining serial cross-sections using an antibody specific for MHCIIx (*fibers positive for MHCIIx showed red staining, but for presentation and discussion purposes in rats and mice these fibers were pseudo-colored purple to avoid confusion with MHCIIb positive fibers*) (Figures 1 & 2). Our procedure also enabled identification of hybrid fibers containing two MHC isoforms (type I/IIA, IIA/X, and IIX/B) (Figures 1, 2, 3). Quantification of fluorescence intensity of previously categorized pure and hybrid fibers demonstrated that hybrid fibers had lower fluorescence intensity in both color channels relative to their respective pure fiber counterparts (*Supplementary Figure S3*). The level of fluorescence was above background values (as this was subtracted to give the net fluorescence), which demonstrates that our categorization of fibers was accurate.

Across 10 muscles we fiber typed an average of  $11,553 \pm 407$  fibers per rat (ranging from  $583 \pm 50$  fibers in WTA to  $2827 \pm 211$  fibers in plantaris) and  $6,738 \pm 237$  fibers per mouse (ranging from  $542 \pm 78$  fibers in WVL to  $857 \pm 50$  fibers in RTA). The fiber type composition for each rat and mouse muscle is given in Table 3 and Table 4, respectively. Of note is the relatively “slower” phenotype in corresponding muscles of rats compared to mice (i.e., soleus and RG). Hybrid fibers were found in all rat and mouse muscles. Fibers co-expressing MHCIIa and MHCIIx (type IIA/X) were the most common hybrid fibers found in both rats and mice, followed by fibers co-expressing MHCIIx and MHCIIb (type IIX/B) (Figures 1 & 2). Although fibers co-expressing MHCI and MHCIIa (type I/IIA) were relatively rare, they were found in all species (Figure 3).

**Table 1.** List of major antibodies and cocktail configurations used for MHC staining of rat, mouse, and human skeletal muscle.

| Species       | Primary Antibody Cocktails and Concentrations | MHC Reactivity | Secondary Antibody Cocktails and Concentrations |
|---------------|-----------------------------------------------|----------------|-------------------------------------------------|
| Rat and Mouse | BA-F8 (1:50)                                  | I              | Alexa Fluor 350 IgG <sub>2b</sub> 1:500 (blue)  |
|               | SC-71 (1:600)                                 | Ila            | Alexa Fluor 488 IgG <sub>1</sub> 1:500 (green)  |
|               | BF-F3 (1:100)                                 | Ilb            | Alexa Fluor 555 IgM 1:500 (red)                 |
| Rat and Mouse | SC-71 (1:600)                                 | Ila            | Alexa Fluor 488 IgG <sub>1</sub> 1:500 (green)  |
|               | 6H1 (1:50)                                    | Ilx            | Alexa Fluor 555 IgM 1:500 (red) <sup>1</sup>    |
| Human         | BA-F8 (1:50)                                  | I              | Alexa Fluor 350 IgG <sub>2b</sub> 1:500 (blue)  |
|               | SC-71 (1:600)                                 | Ila+Ilx*       | Alexa Fluor 488 IgG <sub>1</sub> 1:500 (green)  |
|               | 6H1 (1:50)                                    | Ilx            | Alexa Fluor 555 IgM 1:500 (red)                 |
| Human         | BA-F8 (1:50)                                  | I              | Alexa Fluor 350 IgG <sub>2b</sub> 1:500 (blue)  |
|               | BF-35 (1:100)                                 | I+Ila          | Alexa Fluor 488 IgG <sub>1</sub> 1:500 (green)  |
|               | 6H1 (1:50)                                    | Ilx            | Alexa Fluor 555 IgM 1:500 (red)                 |

All antibody cocktails are prepared in block solution (10% goat serum in PBS).

\*Non-specific cross-reactivity with MHCIIx was observed in human skeletal muscle.

<sup>1</sup>Fibers positive for MHCIIx showed red staining, but for presentation and discussion purposes in rats and mice these fibers were pseudo-colored purple to avoid confusion with MHCIIb positive fibers.

doi:10.1371/journal.pone.0035273.t001

### Rat and Mouse Fiber CSA, SDH Activity, and GPD Activity

In general, SDH staining in rat and mouse muscle was high in type IIA fibers, intermediate in type I and IIX fibers, and low in type IIB fibers. In contrast, GPD staining intensity in rat and mouse muscle was high in type IIB or IIX fibers, intermediate in type IIA fibers, and low in type I fibers. Further, type IIB fibers tended to be the largest, type IIX fibers intermediate in size, and type IIA and I fibers the smallest. With respect to SDH activity, GPD activity, and CSA, hybrid fibers typically fell between the corresponding pure fiber types (Figures 1 & 2; Tables 3 & 4).

Although general fiber type trends were observed for CSA, SDH activity, and GPD activity within a particular muscle, differences in these properties were apparent for a particular fiber type across muscles (Figure 4). For example, CSA was ~2.1-fold higher in type I fibers of rat soleus compared to rat plantaris muscle. Similarly, relative SDH activity was ~2.7-fold higher in type IIXB fibers of rat RTA compared to rat WTA muscle, whereas relative GPD activity was ~2.1-fold higher in type IIA fibers of mouse RTA compared to mouse plantaris muscle.

### Human Muscle Fiber Type, CSA, SDH Activity, and GPD Activity

Incubation of human VL muscle cross-sections with various antibody cocktail combinations resulted in positive staining of the same fibers as serial cross-sections incubated with individual antibodies (*Supplementary Figure S1*). In addition, strong fluorescent staining was observed in muscle incubated with primary and secondary antibody cocktails, whereas negligible staining was observed in control slides incubated with a secondary antibody cocktail only (*Supplementary Figure S2*). Initial studies were performed with a cocktail containing BA-F8, SC-71, and 6H1. A large subset of fibers demonstrated strong staining only for BA-F8 and were classified as type I fibers. Similarly, a considerable number of fibers stained strongly only for SC-71 and were classified as type IIA fibers. A very small subset of fibers stained intermediate for both BA-F8 and SC-71 and were classified as type I/IIA fibers (Figure 3). SC-71 also intermediately stained a subset of fibers which all stained strongly for 6H1; which we initially classified as type IIX fibers. A small set of fibers was also identified that stained intermediate/strong for SC-71 and intermediate for 6H1; which we initially classified as type IIAX fibers (Figure 5).

**Table 2.** Overview of immunofluorescence MHC staining protocol.

| Procedure                                                               | Time                                 |
|-------------------------------------------------------------------------|--------------------------------------|
| Cut O.C.T.-embedded muscle into 10 μm cross-sections and store at -80°C |                                      |
| Air dry sections (entire procedure performed at room temperature)       | 10 min                               |
| Block with 10% goat serum in PBS                                        | 60 min                               |
| Apply 1° antibody cocktail*                                             | 60 min (human, rat); 120 min (mouse) |
| PBS wash                                                                | 3×5 min                              |
| Apply 2° antibody cocktail*                                             | 60 min                               |
| PBS wash                                                                | 3×5 min                              |
| Mount coverslips with Prolong® Gold antifade reagent                    |                                      |

\*See Table 1 for primary and secondary antibody cocktail configurations.

doi:10.1371/journal.pone.0035273.t002

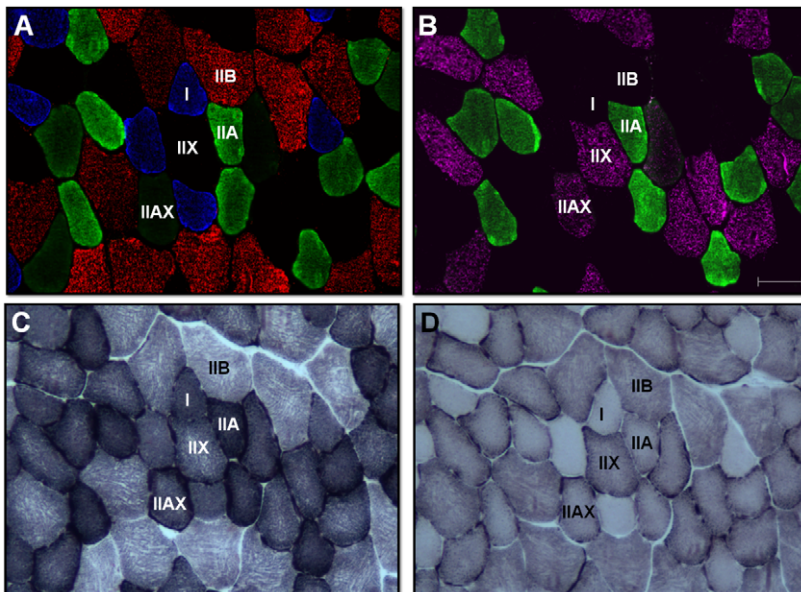

**Figure 1. Representative images of rat red tibialis anterior (RTA) muscle showing MHC expression as well as SDH and GPD activity staining.** Panel A, rat muscle serial cross-section incubated with a primary antibody cocktail against MHC I (BA-F8), MHCIIa (SC-71), and MHCIIb (BF-F3), followed by incubation with appropriate fluorescent-conjugated secondary antibodies. Shown are type I (blue), type IIA (green), type IIB (red), type IIX (unstained), and type IIAx (intermediate green) fibers. Panel B, rat muscle serial cross-section incubated with a primary antibody cocktail against MHCIIa (SC-71) and MHCIIx (6H1), followed by incubation with appropriate fluorescent-conjugated secondary antibodies. This confirms the presence of type IIA (green) fibers, as well as confirms that the unstained fibers and intermediate green stained fibers in Panel A are type IIX (purple) and type IIAx fibers (green and purple), respectively. Panel C, rat muscle serial cross-section showing SDH activity staining. Panel D, rat muscle serial cross-section showing GPD activity staining. Bar represents 50  $\mu$ m.  
doi:10.1371/journal.pone.0035273.g001

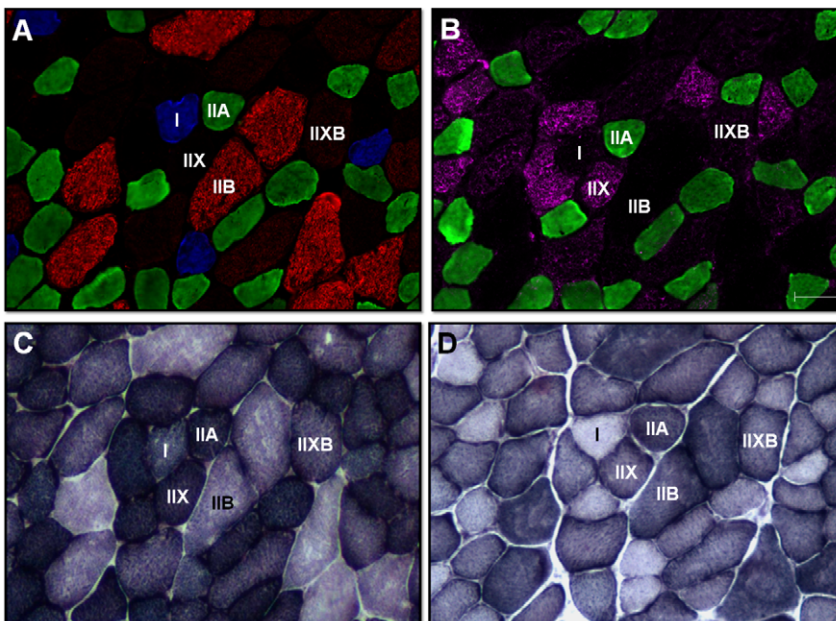

**Figure 2. Representative images of mouse red gastrocnemius (RG) muscle showing MHC expression as well as SDH and GPD activity staining.** Panel A, mouse muscle serial cross-section incubated with a primary antibody cocktail against MHC I (BA-F8), MHCIIa (SC-71), and MHCIIb (BF-F3), followed by incubation with appropriate fluorescent-conjugated secondary antibodies. Shown are type I (blue), type IIA (green), type IIB (red), type IIX (unstained), and type IIXB (intermediate red) fibers. Panel B, mouse muscle serial cross-section incubated with a primary antibody cocktail against MHCIIa (SC-71) and MHCIIx (6H1), followed by incubation with appropriate fluorescent-conjugated secondary antibodies. This confirms the presence of type IIA (green) fibers, as well as confirms that the unstained fibers and intermediate red stained fibers in Panel A are type IIX (purple) and type IIXB (purple and red) fibers, respectively. Panel C, mouse muscle serial cross-section showing SDH activity staining. Panel D, mouse muscle serial cross-section showing GPD activity staining. Bar represents 50  $\mu$ m.  
doi:10.1371/journal.pone.0035273.g002

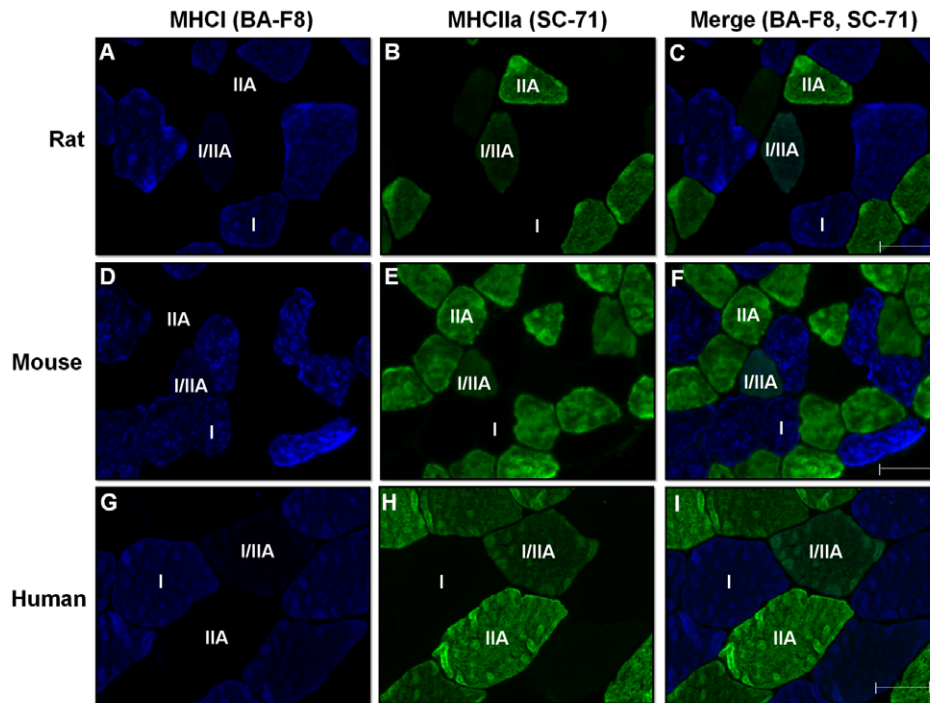

**Figure 3. Representative images of rat, mouse, and human muscle showing type I/IIA hybrid fibers.** Panels A–C (rat RG), D–F (mouse soleus), and G–I (human VL) are images of muscle cross-sections incubated concurrently with primary antibodies against MHCI (BA-F8) and MHCIIa (SC-71) showing type I (blue), type IIA (green), and type I/IIA (blue and green) fibers. Bars represent 50  $\mu\text{m}$ . doi:10.1371/journal.pone.0035273.g003

Given that all fibers staining positive for 6H1 also stained positive for SC-71, this indicated possible non-specific cross-reactivity of the SC-71 antibody in human muscle; an effect not observed in rat or mouse muscle. Interestingly, cross-reactivity of the SC-71 antibody with human MHCIIx has been noted in several reports [21,22]. Subsequent experiments using different pre-treatments and dilutions of SC-71 did not reduce this non-specific cross-reactivity (*data not shown*). Experiments using several dilutions of an additional antibody against MHCIIa (2F7) developed by Lucas and colleagues [15] showed similar cross-reactivity with fibers staining positive for 6H1 (*data not shown*). As such, we utilized the BF-35 antibody noted to be specific for all MHC isoforms except MHCIIx in an attempt to clearly define these fiber populations in human muscle. BF-35 stained fibers that previously stained strongly for BA-F8 and SC-71 only, corresponding to type I and type IIA fibers, respectively (Figure 5). BF-35 did not label fibers which stained strongly for 6H1 (type IIX fibers), but did label a small subset of fibers that stained intermediate for 6H1 (type IIAX fibers) (Figure 5). Using this later method, we were not able to identify type I/IIA hybrids; however, these fibers only represented 0.1% of the total population. Therefore, our previous classification of type I, I/IIA, IIA, IIAX, and IIX fibers in human VL muscle using a single incubation containing BA-F8, SC-71, and 6H1 was accurate (Figure 5 & Table 5). We quantified the fluorescence intensity of previously categorized pure and hybrid fibers and found that hybrid fibers had lower fluorescence intensity in both color channels relative to their respective pure fiber counterparts (*Supplementary Figure S3*). The fluorescence intensity of hybrid fibers was above background values, indicating that these fibers were categorized accurately. In addition, we performed optical sectioning to rule-out potential issues with out-of-focus fluorescence. Although optical sectioning by structured-illumination

microscopy improved resolution compared to conventional wide-field fluorescence microscopy, the ability to discriminate fiber types was similar (*Supplementary Figure S4*).

The relative staining intensity for SDH activity was highest in type I fibers, intermediate in type IIA fibers, and lowest in type IIX fibers. In contrast, relative staining intensity for GPD activity was lowest in type I fibers, intermediate in type IIA fibers, and highest in type IIX fibers. Fiber CSA in human muscle was largest in type IIA fibers, and smallest in type I and IIX fibers (Figures 4 & 5; Table 5).

## Discussion

A number of histological methods have been used to identify muscle fiber types [1,8,10,12,14,16,23,24]. In the present investigation we outline a simple multicolor immunofluorescence procedure to identify pure and hybrid fiber types in multiple species. Compared to other methods, this procedure requires a significantly reduced time-investment due to less tissue processing (cutting of cryosections, staining) and analysis (imaging, matching, counting). Further, all major pure and hybrid fiber types could be easily identified.

A number of studies employing immunohistochemical procedures have identified type IIX fibers based on their non-reactivity with the BF-35 antibody (which stains all fibers except type IIX), due to the unavailability of an acceptable antibody against MHCIIx [14,16,25,26]. We utilized the 6H1 antibody which has been shown to react with the electrophoretically separated band corresponding to MHCIIx, and labels type IIX fibers in cross-sections of a variety of species [15]. We demonstrate that the 6H1 antibody positively stained fibers that remained unstained by other antibodies in rat, mouse, and human muscle, confirming their identity as type IIX fibers. Further, this antibody correctly labelled

**Table 3.** Quantitative analysis of fiber type distribution, CSA, SDH activity, and GPD activity in rat muscles.

| Rat Muscle                             |                        | Fiber Type  |             |             |             |             |             |              |              |
|----------------------------------------|------------------------|-------------|-------------|-------------|-------------|-------------|-------------|--------------|--------------|
|                                        |                        | Fiber Count | Type I      | Type I/IIA  | Type IIA    | Type IIAX   | Type IIX    | Type IIXB    | Type IIB     |
| <b>Red</b>                             | Population (%)         | 853±82      | 39.2±0.9    | 2.2±0.8     | 30.2±1.4    | 4.6±0.4     | 23.8±1.3    | 0            | 0            |
| <b>Gastrocnemius (RG)</b>              | CSA (μm <sup>2</sup> ) | 468±26      | 3337.6±55.0 | 3061.9±52.4 | 3260.6±55.8 | 3527.8±60.4 | 3754.7±64.3 | -            | -            |
|                                        | SDH (AU)               | 468±26      | 0.717±0.120 | 1.095±0.167 | 1.527±0.192 | 1.226±0.139 | 1.088±0.145 | -            | -            |
|                                        | GPD (AU)               | 468±26      | 0.595±0.078 | 1.160±0.309 | 2.004±0.143 | 2.771±0.302 | 3.402±0.313 | -            | -            |
| <b>Mixed</b>                           | Population (%)         | 771±86      | 4.5±1.3     | 0           | 14.9±2.2    | 6.6±0.4     | 42.5±4.7    | 5.6±0.5      | 25.8±5.4     |
| <b>Gastrocnemius (MG)</b>              | CSA (μm <sup>2</sup> ) | 424±29      | 2069.8±39.5 | -           | 2249.1±35.2 | 2835.4±45.0 | 3799.9±65.0 | 5595.6±88.8  | 6576.5±100.3 |
|                                        | SDH (AU)               | 424±29      | 1.022±0.091 | -           | 1.745±0.161 | 1.548±0.095 | 0.978±0.087 | 0.684±0.081  | 0.409±0.037  |
|                                        | GPD (AU)               | 424±29      | 0.893±0.166 | -           | 2.424±0.119 | 2.837±0.187 | 3.232±0.291 | 3.549±0.189  | 3.919±0.183  |
| <b>White</b>                           | Population (%)         | 647±52      | 0           | 0           | 0           | 0           | 7.0±1.0     | 4.9±0.2      | 88.1±1.0     |
| <b>Gastrocnemius (WG)</b>              | CSA (μm <sup>2</sup> ) | 312±22      | -           | -           | -           | -           | 2613.2±42.4 | 3806.8±66.9  | 5426.5±96.3  |
|                                        | SDH (AU)               | 312±22      | -           | -           | -           | -           | 0.849±0.131 | 0.479±0.105  | 0.245±0.046  |
|                                        | GPD (AU)               | 312±22      | -           | -           | -           | -           | 3.133±0.137 | 2.805±0.223  | 2.593±0.032  |
| <b>Soleus (Sol)</b>                    | Population (%)         | 1154±101    | 96.6±1.0    | 0.7±0.1     | 2.7±1.0     | 0           | 0           | 0            | 0            |
|                                        | CSA (μm <sup>2</sup> ) | 497±28      | 4254.4±38.0 | 3553.0±59.5 | 3113.5±47.1 | -           | -           | -            | -            |
|                                        | SDH (AU)               | 497±28      | 1.000±0.058 | 1.524±0.127 | 1.780±0.128 | -           | -           | -            | -            |
|                                        | GPD (AU)               | 497±28      | 1.000±0.176 | 2.468±0.206 | 3.346±0.187 | -           | -           | -            | -            |
| <b>Plantaris (Pla)</b>                 | Population (%)         | 2827±211    | 8.3±0.9     | 0.5±0.1     | 20.5±1.5    | 6.4±0.3     | 44.6±2.6    | 3.2±0.2      | 16.5±2.0     |
|                                        | CSA (μm <sup>2</sup> ) | 1142±37     | 2027.6±39.4 | 2387.6±47.6 | 2436.1±74.1 | 3438.3±63.3 | 4650.3±80.7 | 5992.6±131.2 | 6862.9±107.6 |
|                                        | SDH (AU)               | 1142±37     | 1.328±0.146 | 1.737±0.191 | 2.017±0.137 | 1.458±0.144 | 1.186±0.126 | 0.603±0.067  | 0.412±0.031  |
|                                        | GPD (AU)               | 1142±37     | 1.167±0.022 | 1.564±0.046 | 2.329±0.169 | 2.652±0.096 | 3.361±0.088 | 3.275±0.137  | 3.362±0.125  |
| <b>Extensor Digitorum Longus (EDL)</b> | Population (%)         | 1501±200    | 3.7±0.7     | 0.1±0.1     | 20.0±1.5    | 4.0±0.6     | 30.8±1.3    | 5.4±0.5      | 35.9±2.8     |
|                                        | CSA (μm <sup>2</sup> ) | 601±44      | 1507.5±11.6 | 1848.6±20.9 | 1862.6±7.7  | 2545.7±49.3 | 3085.2±12.7 | 4073.8±13.8  | 5348.1±27.4  |
|                                        | SDH (AU)               | 601±44      | 1.065±0.119 | 1.500±0.145 | 1.891±0.054 | 1.502±0.121 | 1.010±0.080 | 0.711±0.067  | 0.516±0.085  |
|                                        | GPD (AU)               | 601±44      | 1.645±0.073 | 2.365±0.134 | 2.755±0.063 | 3.303±0.204 | 3.478±0.136 | 3.494±0.065  | 3.539±0.077  |
| <b>Red Tibialis Anterior (RTA)</b>     | Population (%)         | 1755±85     | 14.3±1.4    | 0.5±0.1     | 30.3±1.5    | 7.4±0.4     | 25.2±1.5    | 1.7±0.2      | 20.7±1.4     |
|                                        | CSA (μm <sup>2</sup> ) | 707±2       | 1931.3±33.5 | 2271.9±38.9 | 2155.2±34.6 | 2653.2±46.2 | 3106.9±53.2 | 3336.3±57.1  | 4233.1±71.9  |
|                                        | SDH (AU)               | 707±2       | 1.387±0.181 | 1.937±0.220 | 2.317±0.253 | 1.823±0.207 | 1.337±0.158 | 0.993±0.169  | 0.604±0.095  |
|                                        | GPD (AU)               | 707±2       | 1.071±0.078 | 1.657±0.211 | 2.410±0.210 | 2.894±0.170 | 3.178±0.146 | 3.547±0.185  | 3.745±0.179  |
| <b>White Tibialis Anterior (WTA)</b>   | Population (%)         | 583±50      | 0           | 0           | 0           | 1.2±0.4     | 7.0±0.8     | 7.2±0.8      | 84.6±1.2     |
|                                        | CSA (μm <sup>2</sup> ) | 241±4       | -           | -           | -           | 3317.1±56.5 | 3473.8±55.9 | 5925.7±104.5 | 6527.9±116.0 |
|                                        | SDH (AU)               | 241±4       | -           | -           | -           | 1.219±0.028 | 0.758±0.136 | 0.373±0.073  | 0.207±0.053  |
|                                        | GPD (AU)               | 241±4       | -           | -           | -           | 2.283±0.070 | 3.165±0.139 | 3.240±0.060  | 2.961±0.206  |
| <b>Vastus Intermedius (VI)</b>         | Population (%)         | 815±99      | 52.3±3.2    | 2.1±0.7     | 41.3±2.2    | 1.2±0.2     | 2.8±0.8     | 0.3±0.2      | 0            |
|                                        | CSA (μm <sup>2</sup> ) | 417±13      | 4096.7±81.1 | 3764.9±64.4 | 3670.0±62.0 | 4231.5±83.5 | 4871.4±94.4 | 5218.2±19.2  | -            |
|                                        | SDH (AU)               | 417±13      | 0.994±0.173 | 1.360±0.149 | 1.585±0.150 | 1.196±0.191 | 0.917±0.079 | 0.442±0.004  | -            |
|                                        | GPD (AU)               | 417±13      | 1.234±0.053 | 1.670±0.178 | 2.728±0.145 | 3.036±0.129 | 3.448±0.124 | 3.736±0.111  | -            |
| <b>White Vastus Lateralis (WVL)</b>    | Population (%)         | 648±58      | 0           | 0           | 0           | 0           | 2.1±0.2     | 2.0±0.3      | 95.9±0.5     |
|                                        | CSA (μm <sup>2</sup> ) | 278±14      | -           | -           | -           | -           | 4115.8±70.9 | 5021.9±89.0  | 5874.1±104.8 |
|                                        | SDH (AU)               | 278±14      | -           | -           | -           | -           | 0.512±0.040 | 0.425±0.065  | 0.244±0.020  |
|                                        | GPD (AU)               | 278±14      | -           | -           | -           | -           | 2.601±0.224 | 2.608±0.142  | 2.575±0.172  |

SDH and GPD activity staining are expressed relative to the values obtained for rat soleus type I fibers (assigned a reference value of 1.0). The number of fibers counted/quantified for each parameter is also given. Values are means ± SEM (n = 6 per muscle).  
doi:10.1371/journal.pone.0035273.t003

hybrid IIAX and IIXB fibers, which displayed a lower staining intensity. A number of other reports have utilized the 6H1 antibody to identify type IIX fibers in rodent [27–29] and human [22] muscle. We found that a significant number of the total fibers analysed in rat (~32%) and mouse (~28%) muscles expressed

MHCIIx, emphasizing the importance of proper identification of these fibers in rodent muscle.

Although we were limited to a three-color detection method, with the appropriate hardware (a 4-color or more microscopy system) and a modification to the present protocol, simultaneous positive-staining for all four MHC isoforms is possible on a single

**Table 4.** Quantitative analysis of fiber type distribution, CSA, SDH activity, and GPD activity in mouse muscles.

| Mouse Muscle                           |                        | Fiber Count | Fiber Type  |             |              |              |              |              | Type IIB     |
|----------------------------------------|------------------------|-------------|-------------|-------------|--------------|--------------|--------------|--------------|--------------|
|                                        |                        |             | Type I      | Type I/IIA  | Type IIA     | Type IIAX    | Type IIX     | Type IIXB    |              |
| <b>Red</b>                             | Population (%)         | 681±63      | 7.9±0.5     | 0.2±0.1     | 41.6±1.3     | 5.0±0.4      | 19.6±2.1     | 3.6±0.4      | 22.2±1.1     |
| <b>Gastrocnemius (RG)</b>              | CSA (μm <sup>2</sup> ) | 368±43      | 1743.4±28.2 | 1300.6±21.0 | 1346.2±22.8  | 1439.1±24.7  | 2002.2±32.2  | 2476.8±39.9  | 2846.8±47.7  |
|                                        | SDH (AU)               | 368±43      | 1.146±0.061 | 1.431±0.032 | 1.894±0.040  | 1.656±0.066  | 1.332±0.101  | 1.010±0.056  | 0.608±0.044  |
|                                        | GPD (AU)               | 368±43      | 1.237±0.065 | 1.791±0.176 | 2.336±0.146  | 3.225±0.193  | 3.818±0.241  | 4.265±0.178  | 4.831±0.181  |
| <b>Mixed</b>                           | Population (%)         | 576±68      | 0           | 0           | 20.9±1.6     | 3.6±0.4      | 14.8±1.1     | 4.9±0.8      | 55.7±1.4     |
| <b>Gastrocnemius (MG)</b>              | CSA (μm <sup>2</sup> ) | 268±69      | -           | -           | 1088.2±32.2  | 1195.2±42.3  | 1554.4±84.9  | 2281.8±70.8  | 2640.3±85.6  |
|                                        | SDH (AU)               | 268±69      | -           | -           | 1.855±0.079  | 1.744±0.083  | 1.394±0.066  | 1.023±0.048  | 0.443±0.017  |
|                                        | GPD (AU)               | 268±69      | -           | -           | 2.454±0.097  | 3.304±0.058  | 4.143±0.180  | 4.822±0.152  | 5.218±0.192  |
| <b>White</b>                           | Population (%)         | 669±101     | 0           | 0           | 0            | 0            | 1.6±0.6      | 1.5±0.4      | 97.0±0.8     |
| <b>Gastrocnemius (WG)</b>              | CSA (μm <sup>2</sup> ) | 277±43      | -           | -           | -            | -            | 1240.7±20.0  | 1692.9±27.3  | 2639.2±49.3  |
|                                        | SDH (AU)               | 277±43      | -           | -           | -            | -            | 1.030±0.064  | 0.684±0.058  | 0.324±0.033  |
|                                        | GPD (AU)               | 277±43      | -           | -           | -            | -            | 3.362±0.198  | 3.672±0.220  | 4.156±0.195  |
| <b>Soleus (Sol)</b>                    | Population (%)         | 622±60      | 30.6±2.2    | 0.6±0.2     | 49.1±1.2     | 4.4±0.7      | 11.8±1.7     | 0.5±0.1      | 3.1±1.1      |
|                                        | CSA (μm <sup>2</sup> ) | 259±28      | 1560.8±25.6 | 1332.8±20.3 | 1356.4±23.6  | 1550.6±53.7  | 1686.0±32.9  | 1916.4±25.1  | 2266.6±33.5  |
|                                        | SDH (AU)               | 259±28      | 1.000±0.058 | 1.406±0.143 | 1.535±0.083  | 1.436±0.051  | 1.170±0.053  | 0.928±0.014  | 0.576±0.010  |
|                                        | GPD (AU)               | 259±28      | 1.000±0.099 | 1.506±0.024 | 1.885±0.067  | 3.305±0.118  | 3.666±0.179  | 4.739±0.079  | 5.231±0.100  |
| <b>Plantaris (Pla)</b>                 | Population (%)         | 730±48      | 0           | 0           | 19.4±1.4     | 8.3±0.8      | 22.4±2.3     | 3.0±0.6      | 46.9±2.4     |
|                                        | CSA (μm <sup>2</sup> ) | 362±38      | -           | -           | 1073.2±109.9 | 1222.3±107.1 | 1775.7±135.1 | 2308.0±124.6 | 2619.7±106.4 |
|                                        | SDH (AU)               | 362±38      | -           | -           | 1.599±0.091  | 1.381±0.083  | 1.048±0.068  | 0.720±0.066  | 0.443±0.026  |
|                                        | GPD (AU)               | 362±38      | -           | -           | 1.511±0.061  | 2.273±0.078  | 2.950±0.155  | 3.456±0.335  | 3.900±0.347  |
| <b>Extensor Digitorum Longus (EDL)</b> | Population (%)         | 758±59      | 0           | 0           | 10.2±0.9     | 3.6±0.5      | 23.7±0.9     | 6.8±0.6      | 55.7±1.2     |
|                                        | CSA (μm <sup>2</sup> ) | 307±35      | -           | -           | 517.3±11.7   | 528.2±5.6    | 953.9±53.2   | 1270.9±52.1  | 2108.4±52.1  |
|                                        | SDH (AU)               | 307±35      | -           | -           | 1.495±0.124  | 1.384±0.089  | 1.027±0.054  | 0.775±0.056  | 0.356±0.022  |
|                                        | GPD (AU)               | 307±35      | -           | -           | 2.164±0.154  | 2.889±0.195  | 3.421±0.229  | 3.694±0.195  | 4.055±0.295  |
| <b>Red Tibialis Anterior (RTA)</b>     | Population (%)         | 857±50      | 0.6±0.6     | 0           | 18.2±2.4     | 8.3±0.5      | 44.7±1.9     | 3.0±0.5      | 25.1±1.6     |
|                                        | CSA (μm <sup>2</sup> ) | 368±51      | 1501.4±7.1  | -           | 1369.6±22.4  | 1665.0±26.8  | 2186.0±35.2  | 2610.6±53.1  | 3073.8±51.3  |
|                                        | SDH (AU)               | 368±51      | 0.948±0.002 | -           | 1.773±0.006  | 1.587±0.057  | 1.211±0.041  | 0.685±0.015  | 0.444±0.026  |
|                                        | GPD (AU)               | 368±51      | 1.821±0.007 | -           | 3.122±0.133  | 4.015±0.144  | 4.694±0.165  | 5.161±0.209  | 5.568±0.202  |
| <b>White Tibialis Anterior (WTA)</b>   | Population (%)         | 600±59      | 0           | 0           | 0.6±0.3      | 4.4±0.5      | 16.3±1.7     | 7.7±1.2      | 70.9±1.8     |
|                                        | CSA (μm <sup>2</sup> ) | 249±17      | -           | -           | 735.7±31.2   | 998.4±46.3   | 1415.8±23.4  | 2166.4±36.2  | 3010.1±51.6  |
|                                        | SDH (AU)               | 249±17      | -           | -           | 1.094±0.144  | 0.949±0.083  | 0.574±0.123  | 0.429±0.156  | 0.209±0.056  |
|                                        | GPD (AU)               | 249±17      | -           | -           | 3.394±0.192  | 4.189±0.155  | 4.362±0.054  | 4.897±0.107  | 4.995±0.094  |
| <b>Vastus Intermedius (VI)</b>         | Population (%)         | 703±54      | 2.4±0.5     | 0.3±0.2     | 37.6±3.2     | 9.4±0.6      | 24.7±1.3     | 2.1±0.5      | 23.5±2.5     |
|                                        | CSA (μm <sup>2</sup> ) | 332±37      | 2579.3±63.4 | 2042.4±19.8 | 2087.8±29.3  | 2396.9±74.9  | 2736.2±64.6  | 2873.3±61.1  | 3732.1±102.1 |
|                                        | SDH (AU)               | 332±37      | 1.059±0.042 | 1.180±0.026 | 1.613±0.052  | 1.395±0.055  | 1.188±0.013  | 0.703±0.033  | 0.415±0.038  |
|                                        | GPD (AU)               | 332±37      | 1.161±0.028 | 1.485±0.175 | 2.179±0.145  | 2.872±0.124  | 3.279±0.085  | 4.065±0.124  | 4.245±0.154  |
| <b>White Vastus Lateralis (WVL)</b>    | Population (%)         | 542±78      | 0           | 0           | 0            | 0            | 1.3±0.3      | 5.4±0.7      | 93.4±0.9     |
|                                        | CSA (μm <sup>2</sup> ) | 218±32      | -           | -           | -            | -            | 913.0±25.5   | 1489.2±35.0  | 3489.8±92.0  |
|                                        | SDH (AU)               | 218±32      | -           | -           | -            | -            | 1.069±0.124  | 0.700±0.048  | 0.252±0.018  |
|                                        | GPD (AU)               | 218±32      | -           | -           | -            | -            | 3.531±0.158  | 3.740±0.156  | 3.827±0.173  |

SDH and GPD activity staining are expressed relative to the values obtained for mouse soleus type I fibers (assigned a reference value of 1.0). The number of fibers counted/quantified for each parameter is also given. Values are means ± SEM (n=6 per muscle).

doi:10.1371/journal.pone.0035273.t004

cross-section. In particular, antibody conjugation kits are available that allow for labelling of each primary antibody with a distinct fluorophore, thereby eliminating the need for a secondary antibody step. Further, given the increasing spectrum of available fluorophores and microscopy imaging systems, it is possible to not only identify all four MHC isoforms, but other proteins/markers

of interest simultaneously on a single cross-section. It is important to note that others have previously performed multicolor analysis of MHC expression in rodent muscles [30–33]; however, we clearly outline a simple approach that can be used for the positive identification of all major pure and hybrid fiber populations in rat, mouse, and human muscle. Given the ease and information

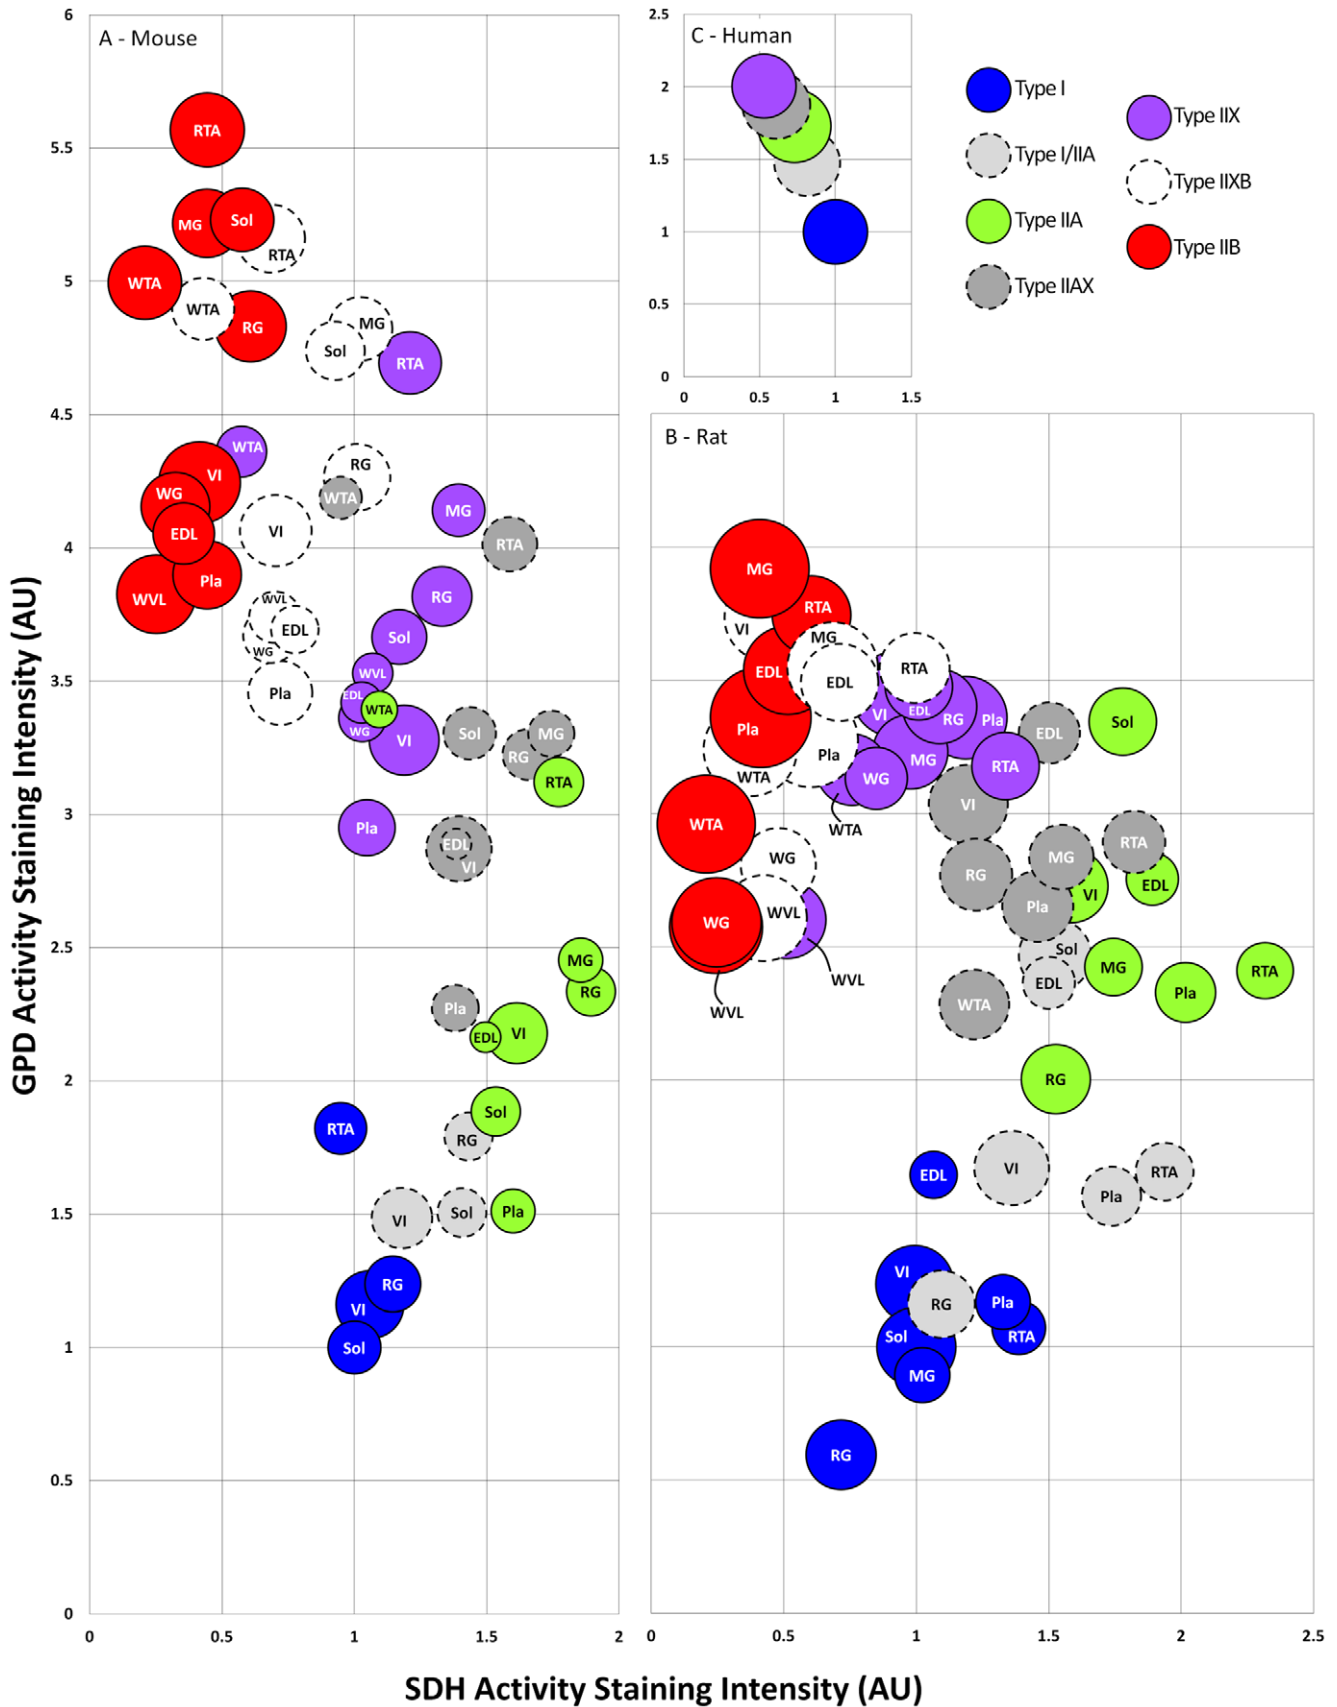

**Figure 4. Bubble plot showing SDH activity, GPD activity, and CSA for each fiber type in mouse, rat, and human skeletal muscles.** Panel A, relative fiber type-specific SDH activity, GPD activity, and CSA for ten mouse skeletal muscles. Panel B, relative fiber type-specific SDH activity,



GPD activity, and CSA for ten rat skeletal muscles. Panel C, relative fiber type-specific SDH activity, GPD activity, and CSA for human VL muscle. Data presented in this figure are from Tables 3, 4, and 5. Bubble size represents the relative CSA within a species. SDH and GPD activity are expressed relative to the values obtained in type I fibers (soleus for mouse and rat, VL for human) and assigned a reference value of 1.0. doi:10.1371/journal.pone.0035273.g004

obtained by multicolor immunofluorescence analysis, we feel that a procedure like the one presented in this paper can be adopted as a standard protocol for identifying MHC expression in rat, mouse, and human muscle cross-sections. Interestingly, human muscle samples incubated with SC-71 (specific for MHCIIa in mice and rats) showed intermediate staining in all fibers that stained positive for MHCIIx (6H1), which is in agreement with others [21,22]. In an attempt to clarify this issue we used an additional antibody (2F7) also noted to be specific for MHCIIa in several species [15]; however, we observed similar cross-reactivity. Smerdu and Soukup [22] found that another commercially available antibody (A7.74) noted to react with MHCIIa also cross-reacted with MHCIIx in human muscle. Further studies are needed to clarify the differential cross-reactivity of these MHCIIa antibodies in rodent and human muscle.

Although a comprehensive comparison of fiber type composition to existing literature is beyond the scope of this manuscript, the fiber type distributions of specific muscles reported here are in general agreement with previous work in rats [9,34–38] and mice [25,28,31,39–41]; however, there are notable differences across studies. Our results in humans confirm our previous report using myosin ATPase activity [17] and are in agreement with previous work [42–44]. We found that hybrid fibers were present in all rat and mouse muscles analysed and made up a significant proportion

of most muscles. For example, rat EDL, RTA, and plantaris contained 9.5%, 9.6%, and 10.1% hybrid fibers, respectively (Table 3). Similarly, mouse EDL, RTA, and plantaris contained 10.4%, 11.3%, and 11.3% hybrid fibers, respectively (Table 4). Delp and Duan previously reported that hybrid fibers were found in some rat muscles but only made up a minor portion (<5%) of the total number of fibers. In contrast, Lucas et al. [15] found 4% hybrid fibers in the superficial region of the TA and 11% hybrid fibers in the deep region of the TA of rats. Approximately 12% of the fibers in the TA [16] and medial gastrocnemius [45] muscles of rats were reported to be hybrids. Similarly, it was found that the hybrid population ranged from 8.8% to 17.8% across five rat muscles [46]. In mice, hybrid fibers made up 4.9% of the TA muscle [16] and ranged from 18.2% to 28.7% across four muscles [47]. Collectively, these studies, along with our current report, demonstrate that hybrids account for a significant proportion of the fiber population in some rat and mouse muscles, and must be considered and properly identified in future research.

Some general relationships, which were consistent with previous reports, were observed between fiber types with respect to rat and mouse CSA [9,25,26,35,46,48,49], SDH activity [16,26,35,45,48–52], and GPD activity [26,35,45,49,51] staining. Similarly, our human CSA, SDH activity, and GPD activity data are in general agreement with previously published literature [44,53–55].

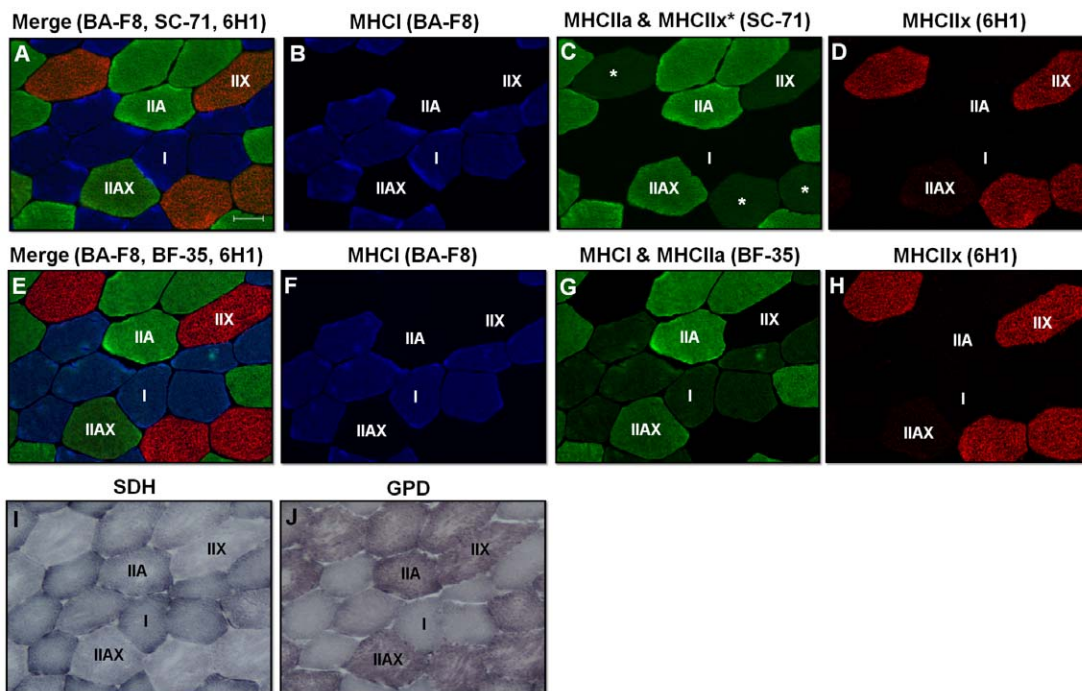

**Figure 5. Representative images of human muscle showing MHC expression as well as SDH and GPD activity staining.** Panels A–D, merged and single channel images of a human vastus lateralis (VL) muscle serial cross-section incubated with an antibody cocktail (BA-F8, SC-71, and 6H1). Shown are type I (blue), type IIA (strong green), type IIX (strong red and intermediate green), and type IIAX (intermediate/strong green and intermediate red) fibers. \*Note that the lower intensity staining for SC-71 in type IIX fibers is indicative of non-specific cross-reactivity (see results and discussion for further details). Panels E–H, merged and single channel images of a human VL muscle serial cross-section incubated with an antibody cocktail (BA-F8, BF-35, and 6H1). Shown are type I (blue), type I and type IIA (intermediate green and strong green, respectively), type IIX (strong red), and type IIAX (intermediate/strong green and intermediate red) fibers. Panel I, human VL muscle serial cross-section showing SDH activity staining. Panel J, human VL muscle serial cross-section showing GPD activity staining. Bar represents 50  $\mu$ m. doi:10.1371/journal.pone.0035273.g005

**Table 5.** Quantitative analysis of fiber type distribution, CSA, SDH activity, and GPD activity in human vastus lateralis muscle.

| Human Muscle             |                        | Fiber Count | Fiber Type   |              |              |              |              |
|--------------------------|------------------------|-------------|--------------|--------------|--------------|--------------|--------------|
|                          |                        |             | Type I       | Type I/IIA   | Type IIA     | Type IIAX    | Type IIX     |
| Vastus Lateralis<br>(VL) | Population (%)         | 540±91      | 48.7±0.9     | 0.1±0.1      | 42.2±1.6     | 2.8±0.5      | 6.2±1.6      |
|                          | CSA (µm <sup>2</sup> ) | 224±22      | 5127.8±174.0 | 5341.9±292.2 | 6616.1±209.1 | 5697.0±193.0 | 5123.3±138.1 |
|                          | SDH (AU)               | 224±22      | 1.000±0.044  | 0.813±0.095  | 0.729±0.069  | 0.610±0.068  | 0.529±0.077  |
|                          | GPD (AU)               | 224±22      | 1.000±0.062  | 1.474±0.127  | 1.731±0.049  | 1.775±0.082  | 2.006±0.054  |

SDH and GPD activity staining are expressed relative to the values obtained for human VL type I fibers (assigned a reference value of 1.0). The number of fibers counted/quantified for each parameter is also given. Values are means ± SEM (n = 7).

doi:10.1371/journal.pone.0035273.t005

Collectively, this data provides further confirmation that the MHC immunofluorescence procedure outlined in this report is effective in properly identifying pure and hybrid fibers in multiple species. Although general relationships have been noted for morphological and metabolic properties within fibers of a particular MHC composition, variability exists. For example, it has been previously demonstrated that SDH activity, GPD activity, and CSA were related to MHC composition; however, large variation existed between individual fibers within rat medial gastrocnemius muscle [45,49]. It is possible that some of the variation in these properties within a muscle is due to differences in the muscle portion isolated and/or sampling position; however, we followed the scheme outlined by Armstrong and Phelps [11], and consistently cryo-sectioned at the mid-portion of muscles. In addition, any variability due to sampling position was minimized in the present investigation by quantifying a large portion (over 40%) of the fibers within a muscle/cross-section. We were also able to examine the general size and metabolic characteristics of a particular fiber type across a number of rat and mouse muscles (Figure 4). In general, although fibers of a particular MHC composition showed similar characteristics, notable differences were observed in CSA, SDH activity, and GPD activity between different muscles. Several factors likely contribute to these findings including anatomical and recruitment differences between muscles. Regardless, this data reinforces the notion that fibers of the same MHC composition can show considerable differences in morphological and metabolic properties within and between muscles.

In conclusion, we describe a simple and efficient method for identifying pure and hybrid fibers in rat, mouse, and human muscle cross-sections using commercially available MHC-specific antibodies and immunofluorescence analysis. We suggest that the procedure presented herein will be useful for determining MHC expression and performing fiber type level analysis in rodent and human muscle. In addition, we provide a useful resource of the pure and hybrid fiber type distribution (along with fiber CSA and relative SDH and GPD activity) for a number of rat and mouse muscles.

## Supporting Information

**Figure S1 Representative images of skeletal muscle cross-sections showing positive staining of the same fibers following incubation with individual antibodies versus antibody cocktails.** Panels A–E (rat RTA), F–J (mouse RG), K–O (human VL). Corresponding images were captured using identical exposure parameters within each channel. Bars represent 50 µm. (TIF)

**Figure S2 Representative images of skeletal muscle cross-sections showing typical positive staining compared to background staining.** Panels A, C, and E are cross-sections from rat, mouse, and human muscles, respectively, incubated with only fluorescent-conjugated secondary antibody cocktails. Panels B, D, and F are serial cross-sections incubated with primary antibody cocktails (BA-F8, SC-71, and BF-F3 for rat and mouse; BA-F8, SC-71, and 6H1 for human) followed by incubation with fluorescent-conjugated secondary antibodies. Corresponding images were captured using identical exposure parameters. Bars represent 50 µm. (TIF)

**Figure S3 Quantification of fluorescence staining intensity of previously categorized pure and hybrid fibers.** Fluorescence quantification in rat muscle (Panel A), mouse muscle (Panel B), and human muscle (Panel C). Note that due to the cross-reactivity of the SC-71 antibody with type IIX fibers in human muscle, the green fluorescence in type IIX fibers is not negligible. However, the green fluorescence due to this cross-reactivity in the type IIX fibers is lower than the green fluorescence obtained in both the pure type IIA and hybrid type IIAX fibers. Fluorescence in pure fibers is assigned an arbitrary value of 1.0, with hybrid fibers expressed relative to corresponding pure fibers. Values shown are means ± SEM (n = 2 per species). (TIF)

**Figure S4 Comparison of fluorescent images acquired by widefield versus structured illumination microscopy.** Representative images of a human muscle cross-section incubated with an antibody mixture (BA-F8, SC-71, and 6H1, followed by secondary antibodies) captured using conventional widefield (Panels A–D), or optical sectioning via structured illumination (Panels E–H) fluorescence microscopy. \*Note that the lower intensity staining for SC-71 in the fiber also staining positive for 6H1 (MHCIIx) is indicative of non-specific cross-reactivity (see results and discussion for further details). Bars represent 50 µm. (TIF)

## Acknowledgments

The authors thank Dr. Lawrence Spriet and Dr. George Heigenhauser for help with collection of the human muscle biopsy samples.

## Author Contributions

Conceived and designed the experiments: DB JQ. Performed the experiments: DB JQ. Analyzed the data: DB. Contributed reagents/materials/analysis tools: JQ. Wrote the paper: DB JQ.

## References

- Pette D, Staron RS (1990) Cellular and molecular diversities of mammalian skeletal muscle fibers. *Rev Physiol Biochem Pharmacol* 116: 1–76.
- Spangenburg EE, Booth FW (2003) Molecular regulation of individual skeletal muscle fibre types. *Acta Physiol Scand* 178(4): 413–424.
- Zierath JR, Hawley JA (2004) Skeletal muscle fiber type: Influence on contractile and metabolic properties. *PLoS Biol* 2(10): e348.
- Schiaffino S, Reggiani C (1994) Myosin isoforms in mammalian skeletal muscle. *J Appl Physiol* 77(2): 493–501.
- Smerdu V, Karsch-Mizrachi I, Campione M, Leinwand L, Schiaffino S (1994) Type IIX myosin heavy chain transcripts are expressed in type IIB fibers of human skeletal muscle. *Am J Physiol* 267(6 Pt 1): C1723–8.
- Staron RS, Pette D (1993) The continuum of pure and hybrid myosin heavy chain-based fibre types in rat skeletal muscle. *Histochemistry* 100(2): 149–153.
- Schiaffino S (2010) Fibre types in skeletal muscle: A personal account. *Acta Physiol (Oxf)* 199(4): 451–463.
- Brooke MH, Kaiser KK (1970) Three “myosin adenosine triphosphatase” systems: The nature of their pH lability and sulphhydryl dependence. *J Histochem Cytochem* 18(9): 670–672.
- Delp MD, Duan C (1996) Composition and size of type I, IIA, IID/X, and IIB fibers and citrate synthase activity of rat muscle. *J Appl Physiol* 80(1): 261–270.
- Guth L, Samaha FJ (1970) Procedure for the histochemical demonstration of actomyosin ATPase. *Exp Neurol* 28(2): 365–367.
- Armstrong RB, Phelps RO (1984) Muscle fiber type composition of the rat hindlimb. *Am J Anat* 171(3): 259–272.
- Barnard RJ, Edgerton VR, Furukawa T, Peter JB (1971) Histochemical, biochemical, and contractile properties of red, white, and intermediate fibers. *Am J Physiol* 220(2): 410–414.
- Peter JB, Barnard RJ, Edgerton VR, Gillespie CA, Stempel KE (1972) Metabolic profiles of three fiber types of skeletal muscle in guinea pigs and rabbits. *Biochemistry* 11(14): 2627–2633.
- Schiaffino S, Gorza L, Sartore S, Saggini L, Ausoni S, et al. (1989) Three myosin heavy chain isoforms in type 2 skeletal muscle fibres. *J Muscle Res Cell Motil* 10(3): 197–205.
- Lucas CA, Kang LH, Hoh JF (2000) Monospecific antibodies against the three mammalian fast limb myosin heavy chains. *Biochem Biophys Res Commun* 272(1): 303–308.
- Gorza L (1990) Identification of a novel type 2 fiber population in mammalian skeletal muscle by combined use of histochemical myosin ATPase and anti-myosin monoclonal antibodies. *J Histochem Cytochem* 38(2): 257–265.
- Quadrilatero J, Bombardier E, Norris SM, Talanian JL, Palmer MS, et al. (2010) Prolonged moderate-intensity aerobic exercise does not alter apoptotic signaling and DNA fragmentation in human skeletal muscle. *Am J Physiol Endocrinol Metab* 298(3): E534–47.
- Blanco CE, Sieck GC, Edgerton VR (1988) Quantitative histochemical determination of succinic dehydrogenase activity in skeletal muscle fibres. *Histochem J* 20(4): 230–243.
- Loughlin M (1993) Muscle biopsy: A laboratory investigation. Jordan Hill, Oxford: Butterworth Heineman Ltd.
- Halkjaer-Kristensen J, Ingemann-Hansen T (1979) Microphotometric analysis of NADH-tetrazolium reductase and alpha-glycerophosphate dehydrogenase in human quadriceps muscle. *Histochem J* 11(2): 127–136.
- Bamman MM, Clarke MS, Feeback DL, Talmadge RJ, Stevens BR, et al. (1998) Impact of resistance exercise during bed rest on skeletal muscle sarcopenia and myosin isoform distribution. *J Appl Physiol* 84(1): 157–163.
- Smerdu V, Soukup T (2008) Demonstration of myosin heavy chain isoforms in rat and humans: The specificity of seven available monoclonal antibodies used in immunohistochemical and immunoblotting methods. *Eur J Histochem* 52(3): 179–190.
- Golmick PD, Matoba H (1984) Identification of fiber types in rat skeletal muscle based on the sensitivity of myofibrillar actomyosin ATPase to copper. *Histochemistry* 81(4): 379–383.
- Padykula HA, Herman E (1955) The specificity of the histochemical method for adenosine triphosphatase. *J Histochem Cytochem* 3(3): 170–195.
- Allen DL, Harrison BC, Sartorius C, Byrnes WC, Leinwand LA (2001) Mutation of the IIB myosin heavy chain gene results in muscle fiber loss and compensatory hypertrophy. *Am J Physiol Cell Physiol* 280(3): C637–45.
- Graziottini GH, Rios CM, Rivero JL (2001) Evidence for three fast myosin heavy chain isoforms in type II skeletal muscle fibers in the adult llama (lama glama). *J Histochem Cytochem* 49(8): 1033–1044.
- Arany Z, Lebrasseur N, Morris C, Smith E, Yang W, et al. (2007) The transcriptional coactivator PGC-1beta drives the formation of oxidative type IIX fibers in skeletal muscle. *Cell Metab* 5(1): 35–46.
- Harrison BC, Allen DL, Girten B, Stodieck LS, Kostenuik PJ, et al. (2003) Skeletal muscle adaptations to microgravity exposure in the mouse. *J Appl Physiol* 95(6): 2462–2470.
- Seth A, Steel JH, Nichol D, Pocock V, Kumaran MK, et al. (2007) The transcriptional corepressor RIP140 regulates oxidative metabolism in skeletal muscle. *Cell Metab* 6(3): 236–245.
- Akimoto T, Ribar TJ, Williams RS, Yan Z (2004) Skeletal muscle adaptation in response to voluntary running in Ca<sup>2+</sup>/calmodulin-dependent protein kinase IV-deficient mice. *Am J Physiol Cell Physiol* 287(5): C1311–9.
- Geng T, Li P, Okutsu M, Yin X, Kwok J, et al. (2010) PGC-1alpha plays a functional role in exercise-induced mitochondrial biogenesis and angiogenesis but not fiber-type transformation in mouse skeletal muscle. *Am J Physiol Cell Physiol* 298(3): C572–9.
- McClung JM, Kavazis AN, Whidden MA, DeRuisseau KC, Falk DJ, et al. (2007) Antioxidant administration attenuates mechanical ventilation-induced rat diaphragm muscle atrophy independent of protein kinase B (PKB akt) signalling. *J Physiol* 585(Pt 1): 203–215.
- Trollet C, Anvar SY, Venema A, Hargreaves IP, Foster K, et al. (2010) Molecular and phenotypic characterization of a mouse model of oculopharyngeal muscular dystrophy reveals severe muscular atrophy restricted to fast glycolytic fibres. *Hum Mol Genet* 19(11): 2191–2207.
- Dunn SE, Michel RN (1999) Differential sensitivity of myosin-heavy-chain-typed fibers to distinct aggregates of nerve-mediated activation. *Pflügers Arch* 437(3): 432–440.
- Dunn SE, Michel RN (1997) Coordinated expression of myosin heavy chain isoforms and metabolic enzymes within overloaded rat muscle fibers. *Am J Physiol* 273(2 Pt 1): C371–83.
- Miller TA, Lesniewski LA, Muller-Delp JM, Majors AK, Scalise D, et al. (2001) Hindlimb unloading induces a collagen isoform shift in the soleus muscle of the rat. *Am J Physiol Regul Integr Comp Physiol* 281(5): R1710–7.
- Norenberg KM, Fitts RH (2004) Contractile responses of the rat gastrocnemius and soleus muscles to isotonic resistance exercise. *J Appl Physiol* 97(6): 2322–2332.
- Ryall JG, Plant DR, Gregorevic P, Sillence MN, Lynch GS (2004) Beta 2-agonist administration reverses muscle wasting and improves muscle function in aged rats. *J Physiol* 555(Pt 1): 175–188.
- Garcia-Roves PM, Osler ME, Holmstrom MH, Zierath JR (2008) Gain-of-function R225Q mutation in AMP-activated protein kinase gamma3 subunit increases mitochondrial biogenesis in glycolytic skeletal muscle. *J Biol Chem* 283(51): 35724–35734.
- Landisch RM, Kosir AM, Nelson SA, Baltgalvis KA, Lowe DA (2008) Adaptive and nonadaptive responses to voluntary wheel running by mdx mice. *Muscle Nerve* 38(4): 1290–1303.
- Totsuka Y, Nagao Y, Horii T, Yonekawa H, Imai H, et al. (2003) Physical performance and soleus muscle fiber composition in wild-derived and laboratory inbred mouse strains. *J Appl Physiol* 95(2): 720–727.
- Andersen JL, Gruschy-Knudsen T, Sandri C, Larsson L, Schiaffino S (1999) Bed rest increases the amount of mismatched fibers in human skeletal muscle. *J Appl Physiol* 86(2): 455–460.
- Harridge SD, Bottinelli R, Canepari M, Pellegrino MA, Reggiani C, et al. (1996) Whole-muscle and single-fibre contractile properties and myosin heavy chain isoforms in humans. *Pflügers Arch* 432(5): 913–920.
- Green HJ, Jones S, Ball-Burnett ME, Smith D, Livesey J, et al. (1991) Early muscular and metabolic adaptations to prolonged exercise training in humans. *J Appl Physiol* 70(5): 2032–2038.
- Rivero JL, Talmadge RJ, Edgerton VR (1999) Interrelationships of myofibrillar ATPase activity and metabolic properties of myosin heavy chain-based fibre types in rat skeletal muscle. *Histochem Cell Biol* 111(4): 277–287.
- Staron RS, Kraemer WJ, Hikida RS, Fry AC, Murray JD, et al. (1999) Fiber type composition of four hindlimb muscles of adult fisher 344 rats. *Histochem Cell Biol* 111(2): 117–123.
- Schuenke MD, Kopchick JJ, Hikida RS, Kraemer WJ, Staron RS (2008) Effects of growth hormone overexpression vs. growth hormone receptor gene disruption on mouse hindlimb muscle fiber type composition. *Growth Horm IGF Res* 18(6): 479–486.
- Fuchtbauer EM, Rowleson AM, Gotz K, Friedrich G, Mabuchi K, et al. (1991) Direct correlation of parvalbumin levels with myosin isoforms and succinate dehydrogenase activity on frozen sections of rodent muscle. *J Histochem Cytochem* 39(3): 355–361.
- Rivero JL, Talmadge RJ, Edgerton VR (1998) Fibre size and metabolic properties of myosin heavy chain-based fibre types in rat skeletal muscle. *J Muscle Res Cell Motil* 19(7): 733–742.
- Sieck GC, Zhan WZ, Prakash YS, Daoud MJ, Watchko JF (1995) SDH and actomyosin ATPase activities of different fiber types in rat diaphragm muscle. *J Appl Physiol* 79(5): 1629–1639.
- Hallauer PL, Hastings KE (2002) Coregulation of fast contractile protein transgene and glycolytic enzyme expression in mouse skeletal muscle. *Am J Physiol Cell Physiol* 282(1): C113–24.
- Shortreed KE, Krause MP, Huang JH, Dhanani D, Moradi J, et al. (2009) Muscle-specific adaptations, impaired oxidative capacity and maintenance of contractile function characterize diet-induced obese mouse skeletal muscle. *PLoS One* 4(10): e7293.
- Green H, Goreham C, Ouyang J, Ball-Burnett M, Ranney D (1999) Regulation of fiber size, oxidative potential, and capillarization in human muscle by resistance exercise. *Am J Physiol* 276(2 Pt 2): R591–6.
- Gregory CM, Vandenberg K, Dudley GA (2001) Metabolic enzymes and phenotypic expression among human locomotor muscles. *Muscle Nerve* 24(3): 387–393.
- Gregory CM, Vandenberg K, Castro MJ, Dudley GA (2003) Human and rat skeletal muscle adaptations to spinal cord injury. *Can J Appl Physiol* 28(3): 491–500.
